# Supplementary material for: Drosophila Sirt2/mammalian SIRT3 deacetylates ATP synthase β and regulates complex V activity
Source: PubMed Central journal article supplement — J Cell Biol. 2014 Jul 21;206(2):289–305. doi: 10.1083/jcb.201404118 (PMC4107778; doi:10.1083/jcb.201404118), 2014-07-21
Supplement: supp_jcb.201404118_JCB_201404118_sm.pdf [file supp_jcb.201404118_JCB_201404118_sm.pdf]

Rahman et al., <http://www.jcb.org/cgi/content/full/jcb.201404118/DC1>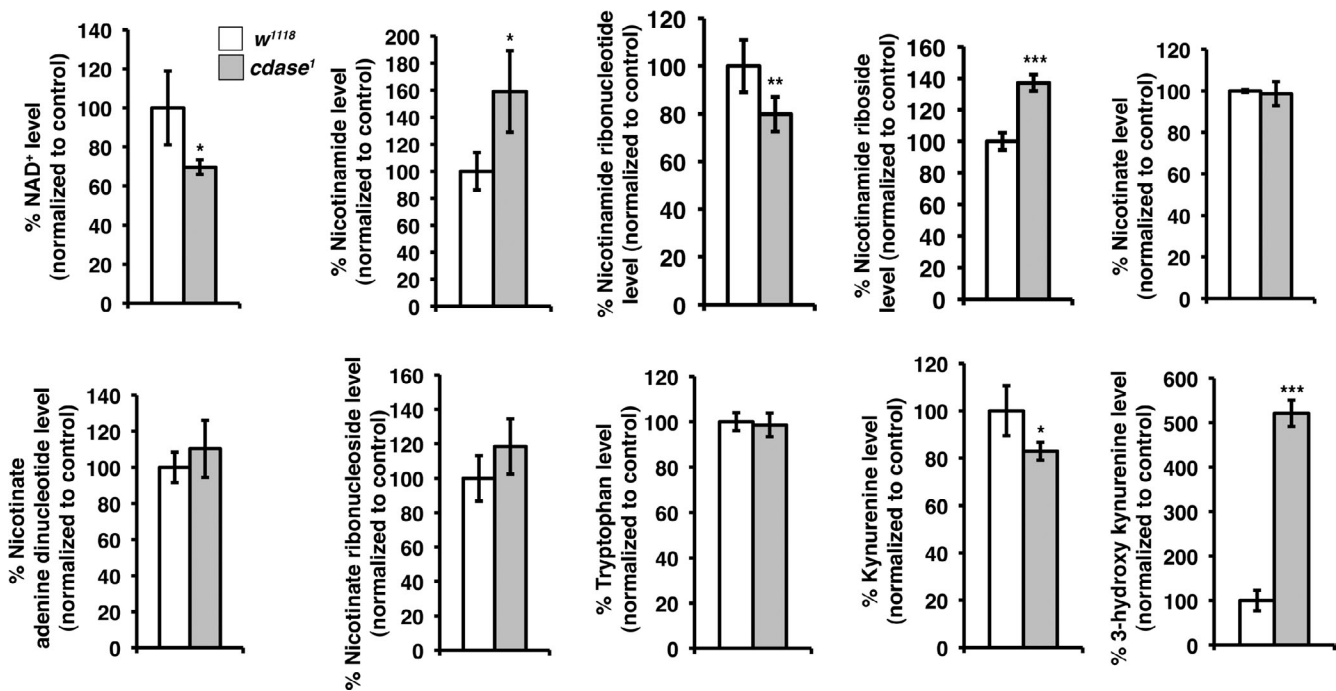

Figure S1. MS measurements of NAD<sup>+</sup> and metabolites involved in the salvage pathway and de novo synthesis of NAD<sup>+</sup> from tryptophan in *cdase<sup>1</sup>* mutants. NAD<sup>+</sup> level is decreased in *cdase<sup>1</sup>* mutants. The levels of nicotinamide riboside (in the salvage pathway) and 3-hydroxy kynurenine (synthesis from tryptophan) are increased. Extracts were prepared from 100 flies, and three replicates were performed. Error bars represent SDs, and statistical significance was determined using Student's *t* test; \*,  $P \leq 0.05-0.01$ ; \*\*,  $P \leq 0.01-0.001$ ; \*\*\*,  $P \leq 0.001-0.0001$ .

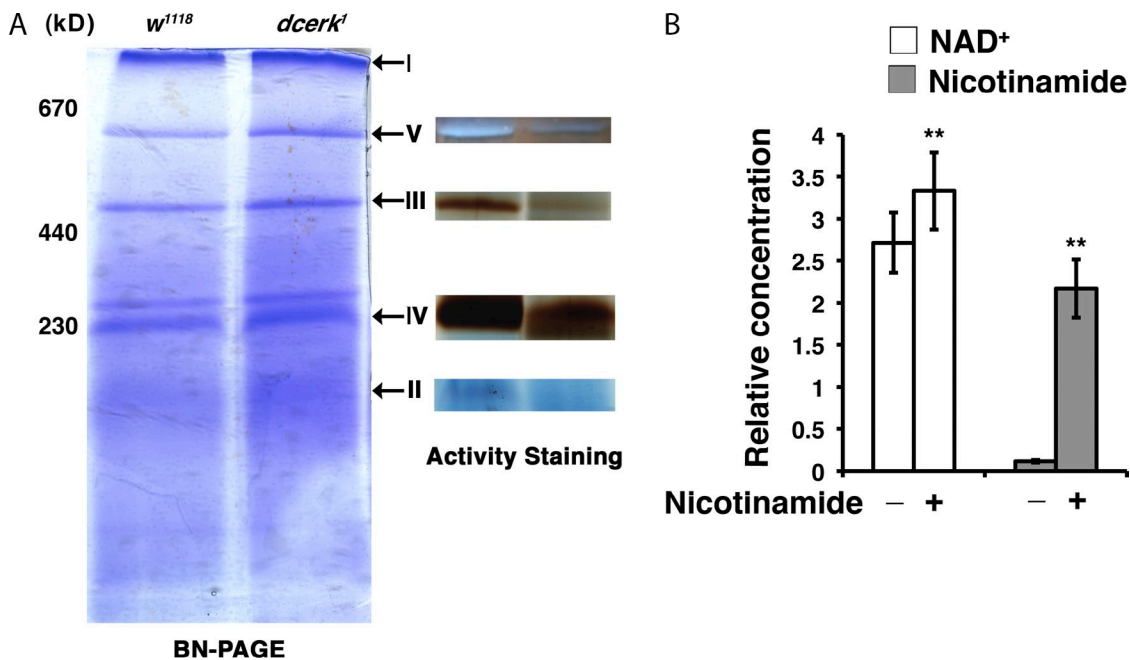

Figure S2. Separation of OXPHOS complexes by BN-PAGE. (A) Separation of mitochondrial OXPHOS complexes from *w<sup>1118</sup>* and *dcerk<sup>1</sup>* by BN-PAGE and their activity staining. (B) Mass spectrometric measurements of NAD<sup>+</sup> and nicotinamide in *w<sup>1118</sup>* flies fed nicotinamide. Error bars represent SDs, and statistical significance was determined using Student's *t* test; \*\*,  $P \leq 0.01-0.001$ .

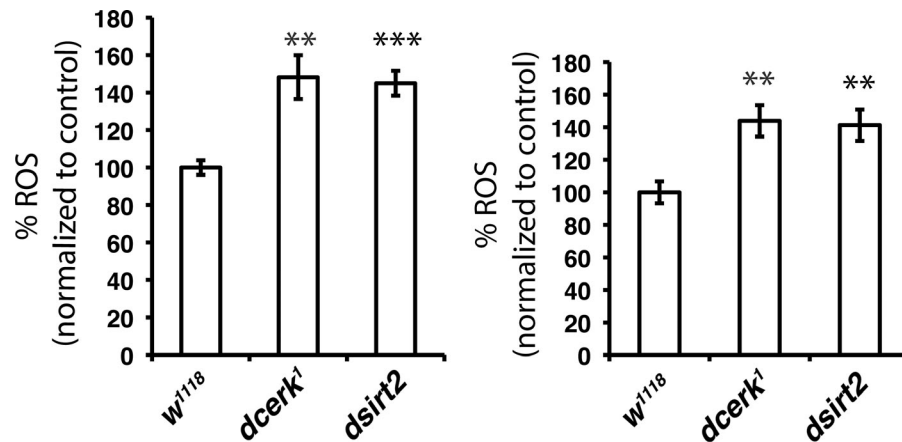

Figure S3. ***dsirt2* mutant flies show increased ROS levels.** Mitochondria were prepared from *w<sup>1118</sup>*, *dcerk<sup>1</sup>*, and *dsirt2* mutants, and ROS production was measured using pyruvate + proline (left) or *sn*-glycerol 3-phosphate (right) as a substrate. ROS levels are increased in *dcerk<sup>1</sup>* and *dsirt2* compared with *w<sup>1118</sup>* mitochondria. Mitochondria were prepared from ~1,000 flies for each batch.  $n = 3$ ; error bars represent SDs. Statistical significance was determined using Student's *t* test: \*\*,  $P \leq 0.01-0.001$ ; \*\*\*,  $P \leq 0.001-0.0001$ .

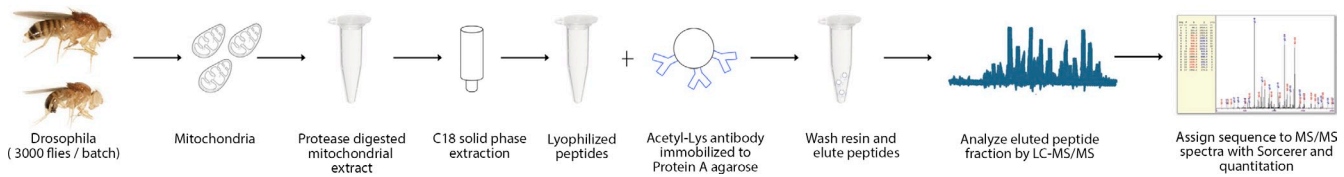

Figure S4. **Strategy for identification of *Drosophila* mitochondrial acetylome and *dSirt2*-regulated acetylome.** Mitochondria were isolated from 3,000 flies (*w<sup>1118</sup>* or *dsirt2*) per batch. The mitochondrial extracts were digested with trypsin and desalted. Acetyl-Lys peptides were immunoprecipitated using an acetyl-Lys antibody. The enriched peptides were separated by LC-MS/MS. The MS/MS spectra were evaluated using SEQUEST 3G and SORCERER 2 platform, and label-free quantitation was performed from the acetyl-Lys peptide intensities. The experiment was performed in duplicate.

**Table S1 shows details of acetyl-Lys peptides in the mitochondrial acetylome identified by MS and is provided in an Excel file.**

**Table S2 shows details of acetyl-Lys peptides that increase in *dsirt2* mutant mitochondrial acetylome identified by MS and is provided in an Excel file.**
